# Supplementary material for: Highly stable copper oxide composite as an effective photocathode for water splitting via a facile electrochemical synthesis strategy
Source: Royal Society of Chemistry journal article supplement (doi:10.1039/c1jm14478b), 2011-12-23
Supplement: c1jm14478b.pdf [file c1jm14478b.pdf]

## Supporting Information

### Highly Stable Copper Oxide Composite as an Effective Photocathode for Water Splitting via a Facile Electrochemical Synthesis Strategy

Zhonghai Zhang<sup>a,b</sup> and Peng Wang<sup>a,b,\*</sup>

<sup>a</sup> Water Desalination and Reuse Center, <sup>b</sup> Chemical and Life Science and Engineering Division, King Abdullah University of Science and Technology, Thuwal 23955-6900, Kingdom of Saudi Arabia

E-mail: [peng.wang@kaust.edu.sa](mailto:peng.wang@kaust.edu.sa); Tel: +966-2-8082380; Fax: +966-544-700089

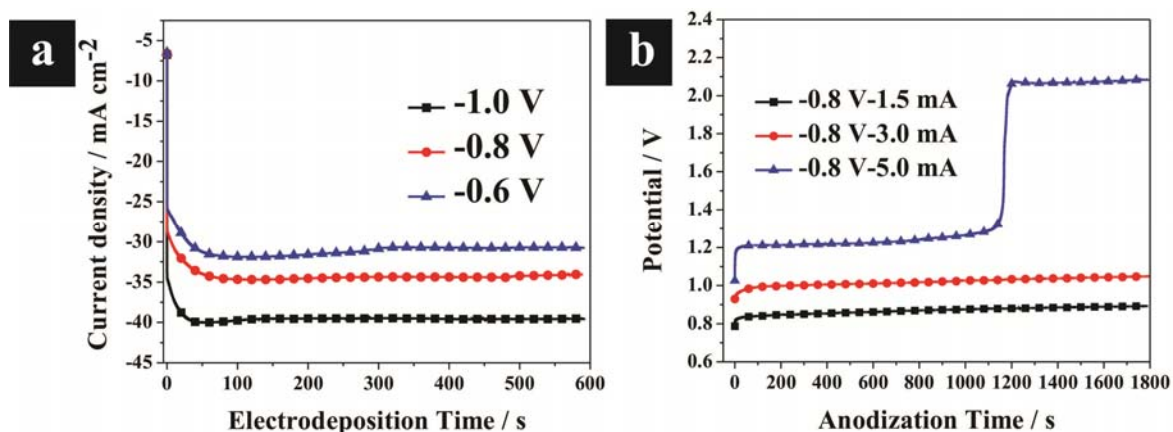

**Fig. S1.** The typical electrochemical curves of (a) electrodeposition of Cu at different potentials and (b) anodization of Cu-0.8 at different current density.

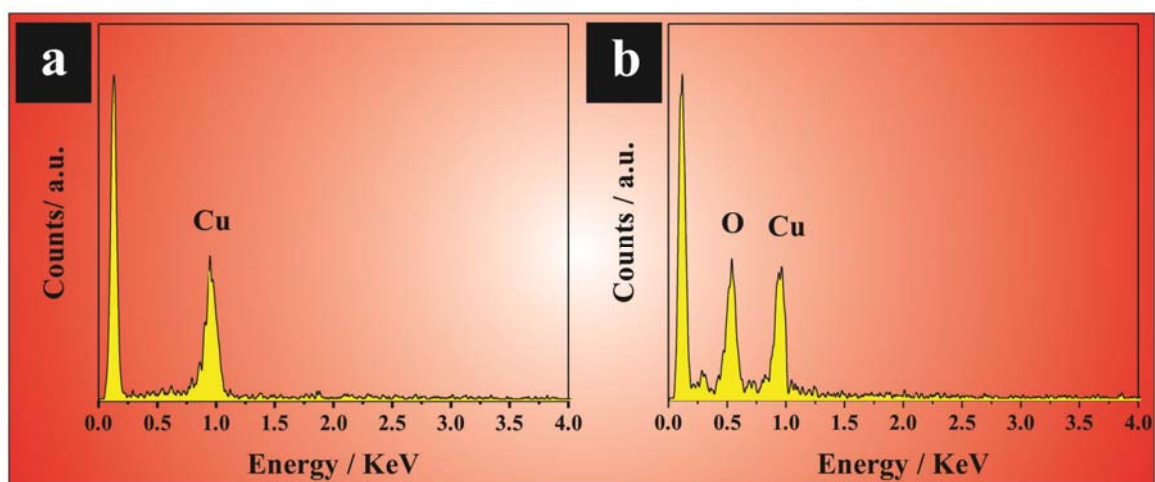

**Fig. S2.** EDS spectra of (a) Cu-1.0; and (b) Cu-1.0/Cu<sub>2</sub>O/Cu(OH)<sub>2</sub>

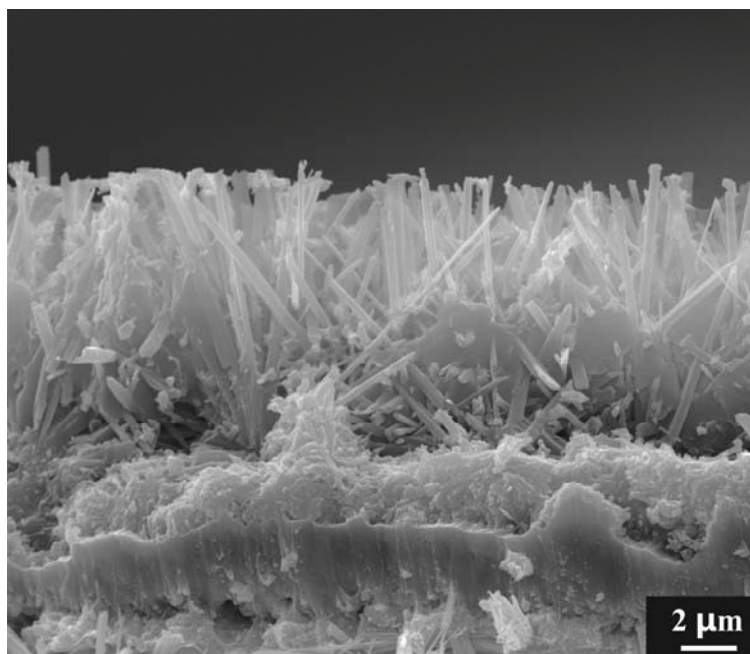

**Fig. S3.** SEM cross-sectional view of Cu-1.0/Cu<sub>2</sub>O/Cu(OH)<sub>2</sub> samples.
